# Supplementary material
Source: PubMed Central journal article supplement (PMC4856435)
Supplement: NIHMS729588-supplement.pdf [file NIHMS729588-supplement.pdf]

## Supplemental Table. Alternative analysis methods.

### I.Logistic regression for stroke with all available variable in model.\*

#### a. Stroke within 90 days

| Var             | OR   | 95% CI          | p-value |
|-----------------|------|-----------------|---------|
| HZ              | 1.50 | ( 0.99 , 2.27 ) | 0.047   |
| Age vs age<65:  |      |                 |         |
| age 65-79       | 3.21 | ( 1.76 , 5.85 ) | <.001   |
| age 80+         | 6.16 | ( 3.30 , 11.5 ) | <.001   |
| Sex = F         | 1.35 | ( 0.90 , 2.03 ) | 0.150   |
| Htn             | 1.45 | ( 0.93 , 2.26 ) | 0.099   |
| CAD             | 1.18 | ( 0.73 , 1.89 ) | 0.502   |
| Lipids          | 1.06 | ( 0.69 , 1.65 ) | 0.778   |
| Arrhythmias     | 1.48 | ( 0.95 , 2.32 ) | 0.086   |
| Depression      | 1.40 | ( 0.85 , 2.33 ) | 0.189   |
| Diabetes        | 1.63 | ( 0.95 , 2.78 ) | 0.075   |
| Substance abuse | 1.32 | ( 0.56 , 3.10 ) | 0.525   |
| Anxiety         | 1.09 | ( 0.61 , 1.93 ) | 0.768   |
| Vasculopathy    | 2.19 | ( 1.06 , 4.51 ) | 0.034   |

- This may be “overfitting” since several risk factors are severely co-linear.

#### b. Stroke within 6 months

| Var             | OR   | 95% CI          | p-value |
|-----------------|------|-----------------|---------|
| HZ              | 1.27 | ( 0.90 , 1.79 ) | 0.178   |
| Age vs age<65:  |      |                 |         |
| age 65-79       | 3.17 | ( 1.99 , 5.05 ) | <.001   |
| age 80+         | 5.30 | ( 3.25 , 8.65 ) | <.001   |
| Sex = F         | 1.22 | ( 0.88 , 1.69 ) | 0.227   |
| Htn             | 1.89 | ( 1.33 , 2.69 ) | <.001   |
| CAD             | 1.20 | ( 0.82 , 1.76 ) | 0.349   |
| Lipids          | 1.20 | ( 0.85 , 1.71 ) | 0.297   |
| Arrhythmias     | 1.21 | ( 0.84 , 1.74 ) | 0.317   |
| Depression      | 1.40 | ( 0.93 , 2.10 ) | 0.108   |
| Diabetes        | 1.52 | ( 0.99 , 2.32 ) | 0.055   |
| Substance abuse | 1.03 | ( 0.47 , 2.24 ) | 0.948   |
| Anxiety         | 1.06 | ( 0.66 , 1.68 ) | 0.819   |
| Vasculopathy    | 2.45 | ( 1.37 , 4.39 ) | 0.003   |

### c. Stroke within 1 year

| Var             | OR   | 95% CI          | p-value |
|-----------------|------|-----------------|---------|
| HZ              | 1.03 | ( 0.78 , 1.35 ) | 0.840   |
| Age vs age<65:  | 2.40 | ( 1.72 , 3.34 ) | <.001   |
| age 65-79       | 4.68 | ( 3.32 , 6.59 ) | <.001   |
| age 80+         | 1.13 | ( 0.89 , 1.45 ) | 0.315   |
| Sex = F         | 1.73 | ( 1.33 , 2.25 ) | <.001   |
| Htn             | 1.35 | ( 1.01 , 1.8 )  | 0.043   |
| CAD             | 1.50 | ( 1.14 , 1.96 ) | 0.003   |
| Lipids          | 1.20 | ( 0.91 , 1.58 ) | 0.200   |
| Arrhythmias     | 1.28 | ( 0.93 , 1.75 ) | 0.127   |
| Depression      | 1.29 | ( 0.94 , 1.76 ) | 0.117   |
| Diabetes        | 1.13 | ( 0.64 , 1.97 ) | 0.675   |
| Substance abuse | 1.03 | ( 0.72 , 1.46 ) | 0.889   |
| Anxiety         | 2.93 | ( 1.90 , 4.51 ) | <.001   |
| Vasculopathy    |      |                 |         |

### d. Stroke within 3 years

| Var             | OR   | 95% CI          | p-value |
|-----------------|------|-----------------|---------|
| HZ              | 1.01 | ( 0.85 , 1.21 ) | 0.902   |
| Age vs age<65:  | 3.51 | ( 2.80 , 4.41 ) | <.001   |
| age 65-79       | 6.94 | ( 5.48 , 8.8 )  | <.001   |
| age 80+         | 1.23 | ( 1.05 , 1.43 ) | 0.011   |
| Sex = F         | 1.61 | ( 1.36 , 1.91 ) | <.001   |
| Htn             | 1.35 | ( 1.12 , 1.62 ) | 0.001   |
| CAD             | 1.41 | ( 1.18 , 1.67 ) | <.001   |
| Lipids          | 1.18 | ( 0.98 , 1.41 ) | 0.073   |
| Arrhythmias     | 1.22 | ( 0.99 , 1.50 ) | 0.060   |
| Depression      | 1.09 | ( 0.90 , 1.31 ) | 0.375   |
| Diabetes        | 1.12 | ( 0.77 , 1.62 ) | 0.563   |
| Substance abuse | 1.10 | ( 0.87 , 1.38 ) | 0.415   |
| Anxiety         | 1.63 | ( 1.16 , 2.29 ) | 0.005   |
| Vasculopathy    |      |                 |         |

## II. Logistic regression for MI with all available variables in model

### a. MI within 90 days

| Var             | OR   | 95% CI          | p-value |
|-----------------|------|-----------------|---------|
| HZ              | 1.65 | ( 1.00 , 2.71 ) | 0.048   |
| Age vs age<65:  |      |                 |         |
| age 65-79       | 1.49 | ( 1.07 , 2.08 ) | 0.020   |
| age 80+         | 1.32 | ( 1.10 , 1.57 ) | 0.003   |
| Sex = F         | 1.11 | ( 0.87 , 1.42 ) | 0.392   |
| Htn             | 1.42 | ( 0.82 , 2.46 ) | 0.209   |
| CAD             | 3.78 | ( 2.21 , 6.46 ) | <.001   |
| Lipids          | 1.22 | ( 0.71 , 2.07 ) | 0.471   |
| Arrhythmias     | 1.03 | ( 0.59 , 1.79 ) | 0.927   |
| Depression      | 1.31 | ( 0.71 , 2.43 ) | 0.386   |
| Diabetes        | 1.52 | ( 0.89 , 2.61 ) | 0.127   |
| Substance abuse | 1.34 | ( 0.47 , 3.77 ) | 0.584   |
| Anxiety         | 1.17 | ( 0.56 , 2.45 ) | 0.672   |
| Vasculopathy    | 1.98 | ( 0.60 , 6.47 ) | 0.260   |

### b. MI within 6 months

| Var             | OR   | 95% CI          | p-value |
|-----------------|------|-----------------|---------|
| HZ              | 1.43 | ( 0.96 , 2.14 ) | 0.079   |
| Age vs age<65:  |      |                 |         |
| age 65-79       | 2.33 | ( 1.36 , 3.99 ) | 0.002   |
| age 80+         | 4.13 | ( 2.35 , 7.27 ) | <.001   |
| Sex = F         | 1.23 | ( 0.83 , 1.82 ) | 0.297   |
| Htn             | 1.29 | ( 0.84 , 1.98 ) | 0.252   |
| CAD             | 3.51 | ( 2.29 , 5.38 ) | <.001   |
| Lipids          | 1.24 | ( 0.81 , 1.90 ) | 0.320   |
| Arrhythmias     | 1.25 | ( 0.79 , 1.96 ) | 0.338   |
| Depression      | 1.29 | ( 0.79 , 2.09 ) | 0.306   |
| Diabetes        | 1.59 | ( 1.04 , 2.44 ) | 0.034   |
| Substance abuse | 1.68 | ( 0.79 , 3.54 ) | 0.175   |
| Anxiety         | 1.06 | ( 0.61 , 1.83 ) | 0.842   |
| Vasculopathy    | 1.04 | ( 0.51 , 2.13 ) | 0.907   |

c. MI within 1 year

| Var             | OR   | 95% CI          | p-value |
|-----------------|------|-----------------|---------|
| HZ              | 1.33 | ( 0.98 , 1.80 ) | 0.065   |
| Age vs age<65:  |      |                 |         |
| age 65-79       | 2.56 | ( 1.73 , 3.80 ) | <.001   |
| age 80+         | 4.59 | ( 3.03 , 6.96 ) | <.001   |
| Sex = F         | 1.59 | ( 1.20 , 2.12 ) | 0.001   |
| Htn             | 1.16 | ( 0.85 , 1.58 ) | 0.358   |
| CAD             | 2.19 | ( 1.58 , 3.04 ) | <.001   |
| Lipids          | 1.37 | ( 1.00 , 1.88 ) | 0.052   |
| Arrhythmias     | 1.02 | ( 0.73 , 1.42 ) | 0.923   |
| Depression      | 1.44 | ( 1.01 , 2.06 ) | 0.044   |
| Diabetes        | 1.80 | ( 1.31 , 2.47 ) | <.001   |
| Substance abuse | 1.51 | ( 0.86 , 2.66 ) | 0.153   |
| Anxiety         | 1.11 | ( 0.72 , 1.71 ) | 0.625   |
| Vasculopathy    | 1.35 | ( 0.82 , 2.24 ) | 0.241   |

d. MI within 3 years

| Var             | OR   | 95% CI          | p-value |
|-----------------|------|-----------------|---------|
| HZ              | 1.17 | ( 0.96 , 1.41 ) | 0.114   |
| Age vs age<65:  |      |                 |         |
| age 65-79       | 2.26 | ( 1.79 , 2.85 ) | <.001   |
| age 80+         | 4.35 | ( 3.41 , 5.56 ) | <.001   |
| Sex = F         | 1.46 | ( 1.23 , 1.73 ) | <.001   |
| Htn             | 1.38 | ( 1.14 , 1.67 ) | 0.001   |
| CAD             | 2.01 | ( 1.64 , 2.46 ) | <.001   |
| Lipids          | 1.19 | ( 0.98 , 1.44 ) | 0.073   |
| Arrhythmias     | 1.09 | ( 0.89 , 1.33 ) | 0.42    |
| Depression      | 1.00 | ( 0.79 , 1.27 ) | 0.986   |
| Diabetes        | 1.51 | ( 1.24 , 1.84 ) | <.001   |
| Substance abuse | 1.35 | ( 0.93 , 1.97 ) | 0.117   |
| Anxiety         | 1.01 | ( 0.78 , 1.32 ) | 0.931   |
| Vasculopathy    | 1.21 | ( 0.87 , 1.68 ) | 0.252   |

### III. Cox proportional hazard models for stroke

#### a. Time to stroke after HZ, all time

|                 | coef    | exp(coef) | se(coef) | z     | p     |
|-----------------|---------|-----------|----------|-------|-------|
| HZ              | 0.0717  | 1.074     | 0.0483   | 1.48  | .14   |
| Age vs age<65:  |         |           |          |       |       |
| age 65-79       | 1.0760  | 2.933     | 0.0533   | 20.19 | <.001 |
| age 80+         | 1.6550  | 5.233     | 0.0641   | 25.84 | <.001 |
| Sex == F        | -0.0876 | 0.916     | 0.0440   | -1.99 | .05   |
| Htn             | 0.4045  | 1.499     | 0.0454   | 8.90  | <.001 |
| CAD             | 0.1794  | 1.197     | 0.0566   | 3.17  | .002  |
| Lipids          | -0.2211 | 0.802     | 0.0493   | -4.48 | <.001 |
| Arrhythmias     | 0.1921  | 1.212     | 0.0564   | 3.41  | <.001 |
| Depression      | 0.124   | 1.130     | 0.0643   | 1.92  | .05   |
| Diabetes        | 0.273   | 1.310     | 0.0567   | 4.83  | <.001 |
| Substance abuse | 0.185   | 1.200     | 0.1127   | 1.64  | .10   |
| Anxiety         | 0.148   | 1.160     | 0.0680   | 2.18  | .03   |
| Vasculopathy    | 0.585   | 1.800     | 0.1138   | 5.14  | <.001 |

#### b. Time to stroke after HZ, censor at 90 days

|                 | coef    | exp(coef) | se(coef) | z      | p     |
|-----------------|---------|-----------|----------|--------|-------|
| HZ              | 0.4837  | 1.62      | 0.225    | 2.150  | .03   |
| Age vs age<65:  |         |           |          |        |       |
| age 65-79       | 1.1963  | 3.31      | 0.327    | 3.661  | <.001 |
| age 80+         | 1.7543  | 5.78      | 0.344    | 5.096  | <.001 |
| Sex == F        | -0.2881 | 0.75      | 0.224    | -1.286 | .20   |
| Htn             | 0.1612  | 1.17      | 0.240    | 0.672  | .50   |
| CAD             | 0.2683  | 1.31      | 0.259    | 1.035  | .30   |
| Lipids          | 0.0317  | 1.03      | 0.240    | 0.132  | .89   |
| Arrhythmias     | 0.2827  | 1.33      | 0.249    | 1.135  | .26   |
| Depression      | 0.496   | 1.643     | 0.272    | 1.823  | .07   |
| Diabetes        | -0.291  | 0.748     | 0.285    | -1.019 | .31   |
| Substance abuse | 0.236   | 1.267     | 0.472    | 0.500  | .62   |
| Anxiety         | -0.158  | 0.854     | 0.331    | -0.478 | .63   |
| Vasculopathy    | 0.867   | 2.379     | 0.388    | 2.235  | .03   |

#### c. Time to stroke after HZ, censor at 6 months

|                 | coef    | exp(coef) | se(coef) | z      | p     |
|-----------------|---------|-----------|----------|--------|-------|
| HZ              | 0.2349  | 1.265     | 0.185    | 1.273  | .20   |
| Age vs age<65:  |         |           |          |        |       |
| age 65-79       | 1.2117  | 3.359     | 0.256    | 4.740  | <.001 |
| age 80+         | 1.7315  | 5.649     | 0.270    | 6.418  | <.001 |
| Sex == F        | -0.3058 | 0.737     | 0.175    | -1.749 | .08   |
| Htn             | 0.5890  | 1.802     | 0.190    | 3.104  | .002  |
| CAD             | 0.0606  | 1.063     | 0.207    | 0.292  | .77   |
| Lipids          | -0.1525 | 0.859     | 0.187    | -0.814 | .42   |
| Arrhythmias     | 0.1844  | 1.202     | 0.197    | 0.937  | .35   |
| Depression      | 0.3175  | 1.374     | 0.221    | 1.439  | .15   |
| Diabetes        | -0.2634 | 0.768     | 0.222    | -1.189 | .23   |
| Substance abuse | 0.1053  | 1.111     | 0.396    | 0.266  | .79   |
| Anxiety         | 0.0954  | 1.100     | 0.249    | 0.384  | .70   |
| Vasculopathy    | 0.7498  | 2.117     | 0.326    | 2.301  | .02   |

#### IV. Cox proportional hazard models for MI

##### a. Time to MI after HZ, all time

|                 | coef    | exp(coef) | se(coef) | z      | p     |
|-----------------|---------|-----------|----------|--------|-------|
| HZ              | 0.0771  | 1.080     | 0.0545   | 1.42   | .16   |
| Age vs age<65:  |         |           |          |        |       |
| age 65-79       | 0.7940  | 2.212     | 0.0586   | 13.54  | <.001 |
| age 80+         | 1.4194  | 4.135     | 0.0710   | 19.99  | <.001 |
| Sex == F        | -0.3482 | 0.706     | 0.0486   | -7.17  | <.001 |
| Htn             | 0.3159  | 1.371     | 0.0518   | 6.10   | <.001 |
| CAD             | 0.5828  | 1.791     | 0.0632   | 9.21   | <.001 |
| Lipids          | -0.1777 | 0.837     | 0.0553   | -3.21  | .001  |
| Arrhythmias     | 0.1651  | 1.179     | 0.0632   | 2.61   | .009  |
| Depression      | 0.0579  | 1.060     | 0.0740   | 0.782  | .43   |
| Diabetes        | 0.4203  | 1.522     | 0.0614   | 6.848  | <.001 |
| Substance abuse | 0.4141  | 1.513     | 0.1136   | 3.646  | <.001 |
| Anxiety         | -0.0736 | 0.929     | 0.0817   | -0.901 | .37   |
| Vasculopathy    | 0.3530  | 1.423     | 0.1102   | 3.204  | .001  |

##### b. Time to MI after HZ, censor at 90 days

|                 | coef    | exp(coef) | se(coef) | z      | p     |
|-----------------|---------|-----------|----------|--------|-------|
| HZ              | 0.41657 | 1.52      | 0.287    | 1.449  | .15   |
| Age vs age<65:  |         |           |          |        |       |
| age 65-79       | 0.50156 | 1.65      | 0.368    | 1.362  | .17   |
| age 80+         | 0.89127 | 2.44      | 0.396    | 2.249  | .02   |
| Sex == F        | 0.05106 | 1.05      | 0.288    | 0.178  | .86   |
| Htn             | 0.30885 | 1.36      | 0.318    | 0.971  | .33   |
| CAD             | 1.50285 | 4.49      | 0.311    | 4.840  | <.001 |
| Lipids          | 0.00182 | 1.00      | 0.304    | 0.006  | 0.999 |
| Arrhythmias     | 0.05625 | 1.06      | 0.317    | 0.177  | .86   |
| Depression      | 0.233   | 1.263     | 0.354    | 0.659  | .51   |
| Diabetes        | 0.289   | 1.336     | 0.314    | 0.922  | .36   |
| Substance abuse | 0.618   | 1.856     | 0.533    | 1.160  | .25   |
| Anxiety         | -0.570  | 0.565     | 0.465    | -1.225 | .22   |
| Vasculopathy    | -0.430  | 0.650     | 0.609    | -0.707 | .48   |

##### c. Time to MI after HZ, censor at 6 months

|                 | coef    | exp(coef) | se(coef) | z      | p     |
|-----------------|---------|-----------|----------|--------|-------|
| HZ              | 0.390   | 1.477     | 0.214    | 1.822  | .07   |
| Age vs age<65:  |         |           |          |        |       |
| age 65-79       | 0.829   | 2.292     | 0.288    | 2.875  | .004  |
| age 80+         | 1.360   | 3.896     | 0.304    | 4.472  | <.001 |
| Sex == F        | -0.154  | 0.858     | 0.210    | -0.730 | .47   |
| Htn             | 0.186   | 1.204     | 0.229    | 0.809  | .42   |
| CAD             | 1.210   | 3.355     | 0.230    | 5.273  | <.001 |
| Lipids          | -0.135  | 0.874     | 0.226    | -0.596 | .55   |
| Arrhythmias     | -0.144  | 0.866     | 0.241    | -0.598 | .55   |
| Depression      | 0.2653  | 1.304     | 0.259    | 1.022  | .31   |
| Diabetes        | 0.4370  | 1.548     | 0.230    | 1.896  | .06   |
| Substance abuse | 0.1371  | 1.147     | 0.468    | 0.293  | .77   |
| Anxiety         | 0.0640  | 1.066     | 0.294    | 0.218  | .83   |
| Vasculopathy    | -0.0771 | 0.926     | 0.405    | -0.190 | .85   |

## V. Stepwise conditional logistic regression models

### a. Stroke within 90 days, univariate model

|               | coef  | exp(coef) | se(coef) | z    | p   |
|---------------|-------|-----------|----------|------|-----|
| stroke 90days | 0.464 | 1.59      | 0.21     | 2.21 | .03 |

### b. Stroke within 90 days, adjusted model

|               | coef  | exp(coef) | se(coef) | z    | p     |
|---------------|-------|-----------|----------|------|-------|
| stroke 90days | 0.422 | 1.53      | 0.2120   | 1.99 | .046  |
| Vasculopathy  | 0.222 | 1.25      | 0.1121   | 1.98 | .048  |
| Arrhythmias   | 0.387 | 1.47      | 0.0453   | 8.55 | <.001 |

## VI. Stepwise conditional logistic regression models

### a. MI within 90 days, univariate model

|           | coef  | exp(coef) | se(coef) | z   | p    |
|-----------|-------|-----------|----------|-----|------|
| MI 90days | 0.436 | 1.55      | 0.167    | 2.6 | .009 |

### b. MI within 90 days, adjusted model

|           | coef  | exp(coef) | se(coef) | z    | p     |
|-----------|-------|-----------|----------|------|-------|
| MI 90days | 0.317 | 1.37      | 0.1688   | 1.88 | .06   |
| CAD       | 0.316 | 1.37      | 0.0464   | 6.81 | <.001 |
